# Supplementary material
Source: Springer Nature journal article supplement (https://www.springermedizin.de/resource/supplementary/12865_2010_342_MOESM6_ESM.pdf/9427792)

**A.**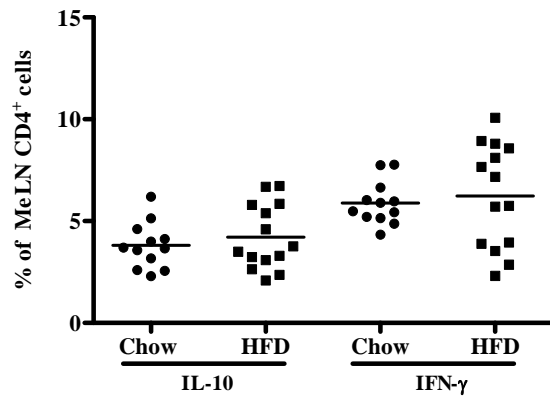**B.**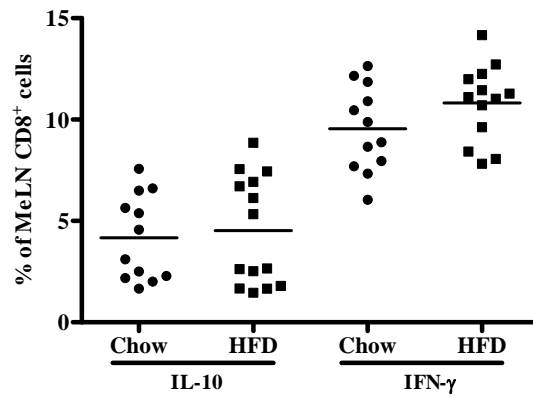**C.**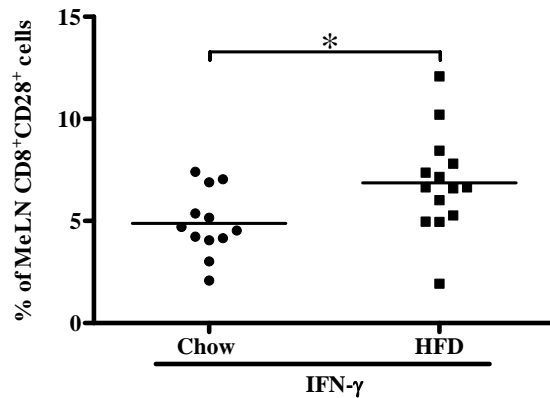**D.**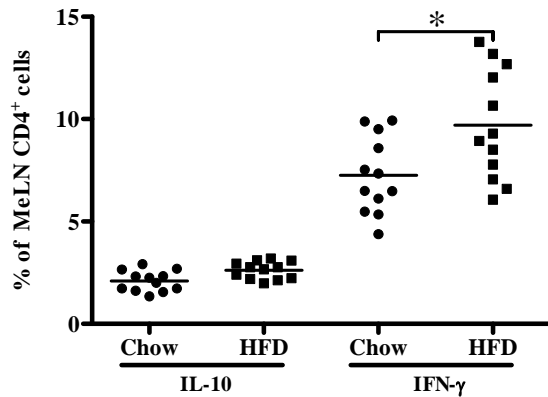**E.**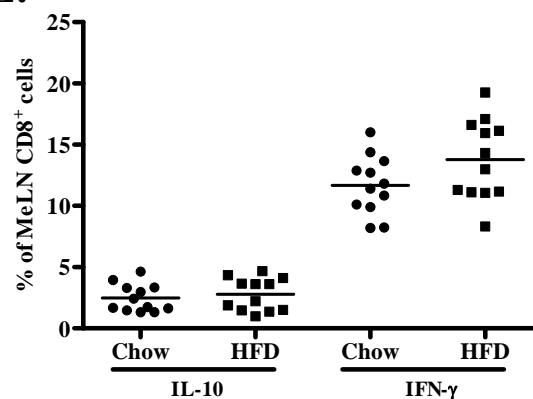**F.**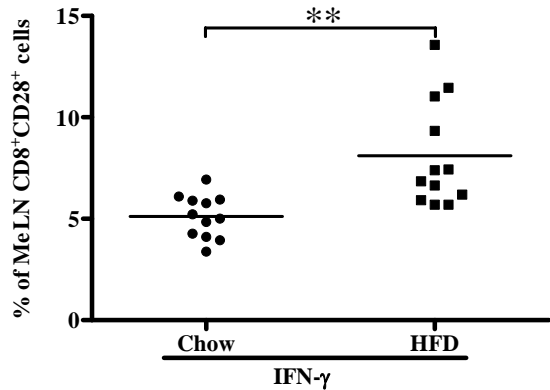

Supplement: MOESM6 [file 9427792]
